# Supplementary material for: Properties Optimization of Polypropylene/Montmorillonite Nanocomposite Drawn Fibers
Source: MDPI journal article supplement (doi:10.3390/nano14020223), 2024-01-19
Supplement: s1 [file s1]

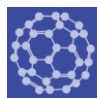

Supplementary Information for

# Properties Optimization of Polypropylene/Montmorillonite Nanocomposite Drawn Fibers

Konstantinos Leontiadis <sup>1</sup>, Katerina Theodoratou <sup>1</sup>, Costas Tsiptsias <sup>2</sup> and Ioannis Tsivintzelis <sup>1,\*</sup>

<sup>1</sup> Department of Chemical Engineering, Aristotle University of Thessaloniki, University Campus, 54124 Thessaloniki, Greece

<sup>2</sup> Department of Chemical Engineering, University of Western Macedonia, 50132 Kozani, Greece

\* Correspondence: tioannis@cheng.auth.gr

**Citation:** Leontiadis, K.; Theodoratou, K.; Tsiptsias, C.; Tsivintzelis, I. Properties Optimization of Polypropylene/Montmorillonite Nanocomposite Drawn Fibers. *Nanomaterials* **2024**, *14*, 223. <https://doi.org/10.3390/nano14020223>

Academic Editor: Boris Mahltig

Received: 9 December 2023

Revised: 12 January 2024

Accepted: 16 January 2024

Published: 19 January 2024

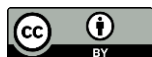

**Copyright:** © 2024 by the authors. Licensee MDPI, Basel, Switzerland. This article is an open access article distributed under the terms and conditions of the Creative Commons Attribution (CC BY) license (<https://creativecommons.org/licenses/by/4.0/>).

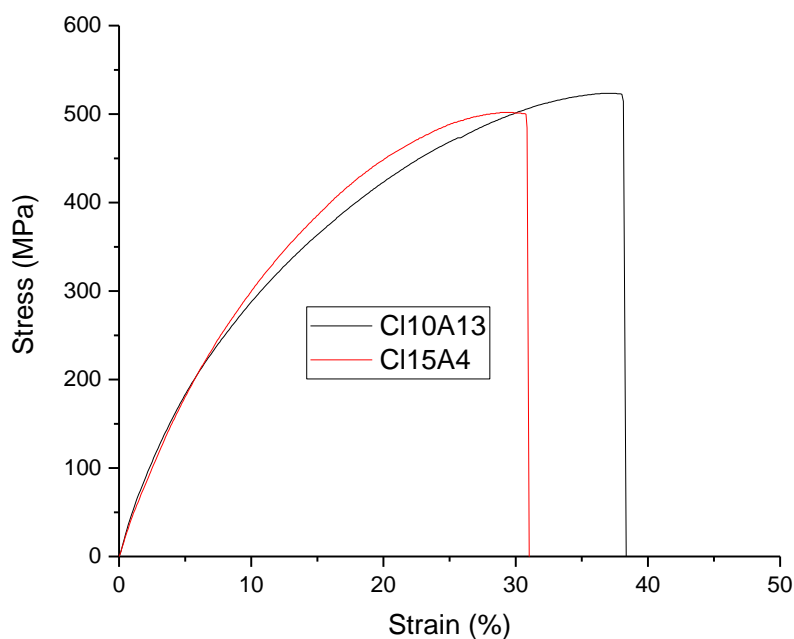

**Figure S1.** Typical stress-strain curves (see Tables 3 and 6 of the main file for the composition of the CI10A13 and CI15A4 samples, respectively).

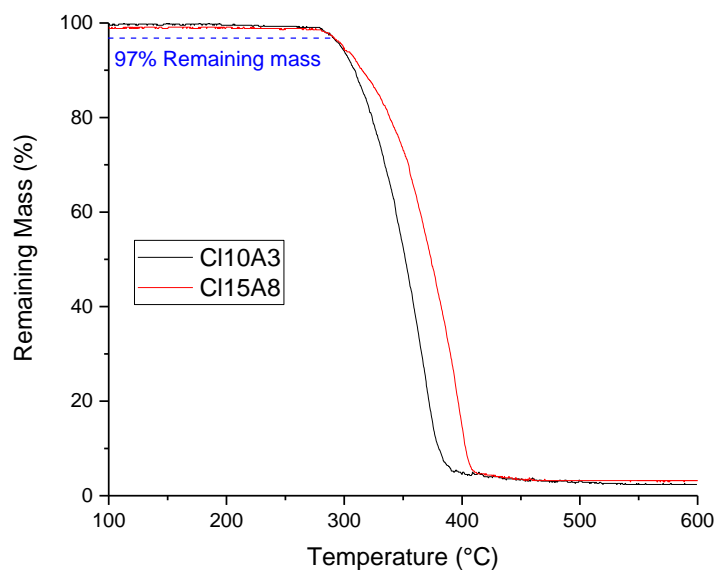

**Figure S2.** Typical TGA curves (see Tables 3 and 6 of the main file for the composition of the CI10A3 and CI15A8 samples, respectively).

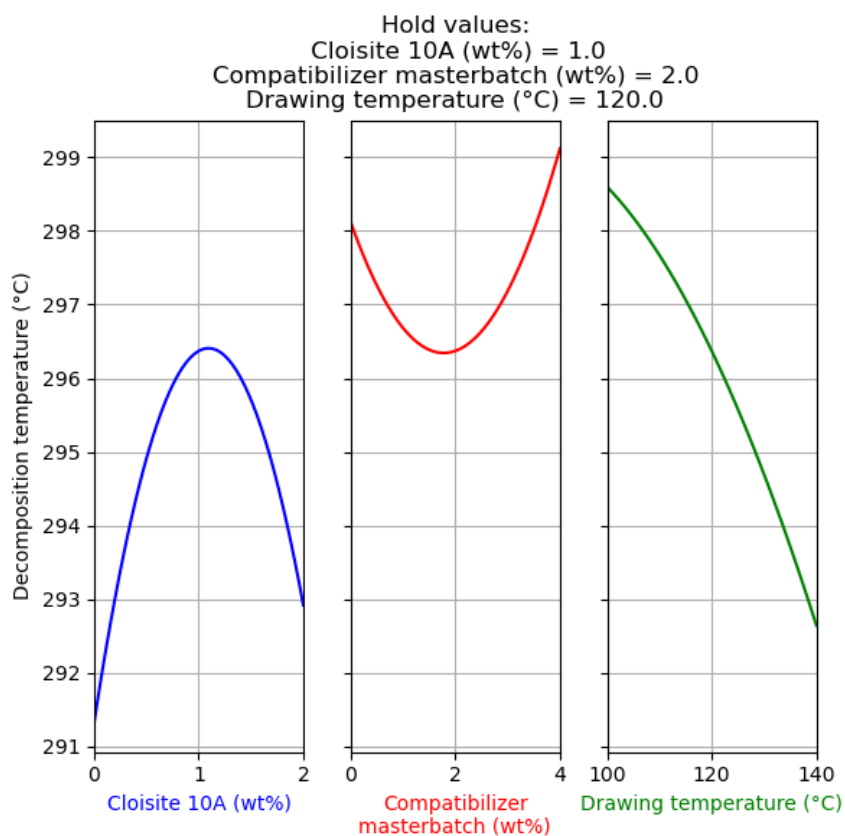

**Figure S3.** Main effect of factors on decomposition temperature regarding the composites with Cloisite® 10A.

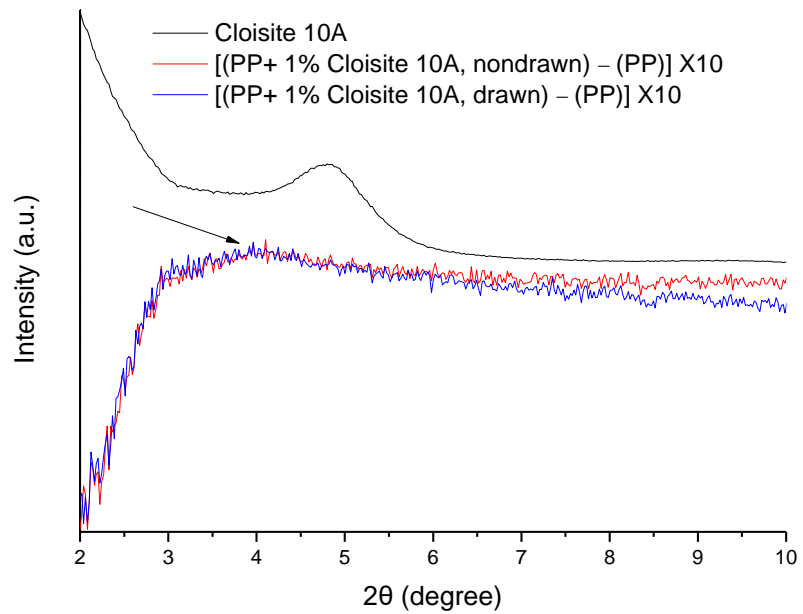

**Figure S4.** XRD diffractograms of Cloisite 10A, and subtracted diffractogram of PP+1% Cloisite<sup>®</sup> 10A (drawn and non-drawn fibers) minus PP. The subtracted diffractogram was multiplied by 10.

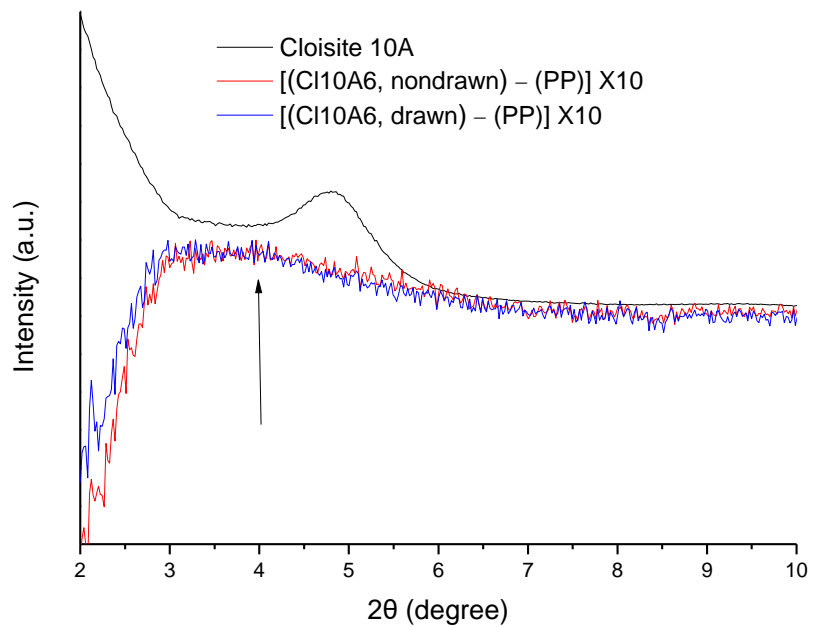

**Figure S5.** XRD diffractograms of Cloisite<sup>®</sup> 10A, and subtracted diffractogram of the Cl10A6 samples (drawn and non-drawn fibers) minus PP. The subtracted diffractogram was multiplied by 10.

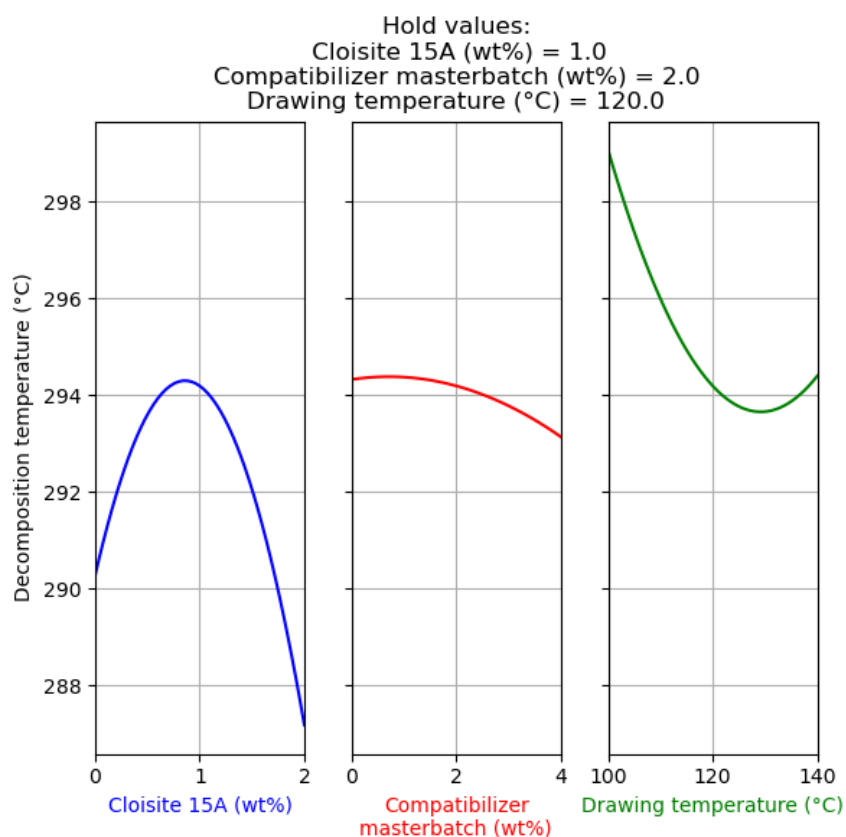

**Figure S6.** Main effect of factors on decomposition temperature, regarding the composites with Cloisite® 15A.

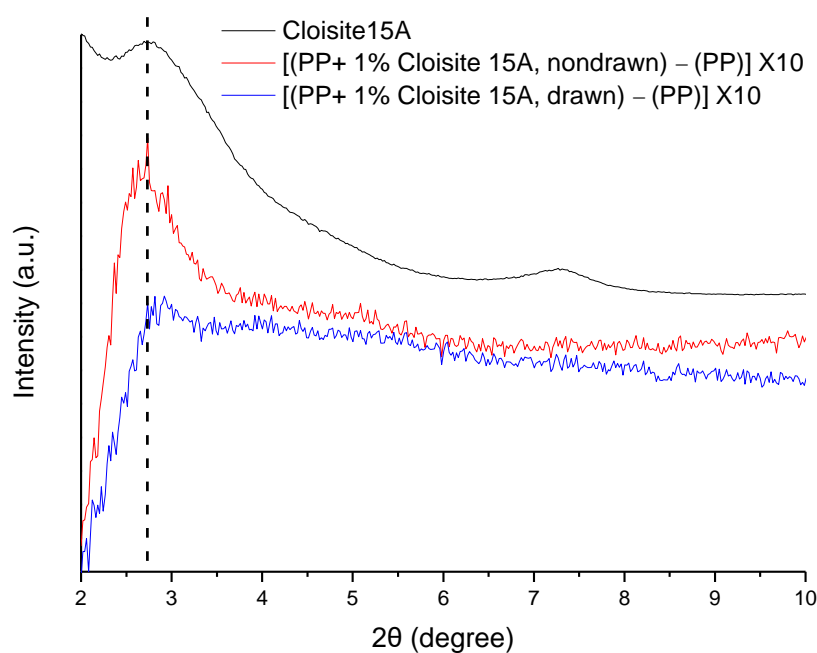

**Figure S7.** XRD diffractograms of Cloisite® 15A, and subtracted diffractogram of PP+1% Cloisite® 15A (drawn and non-drawn fibers) minus PP. The subtracted diffractogram was multiplied by 10.

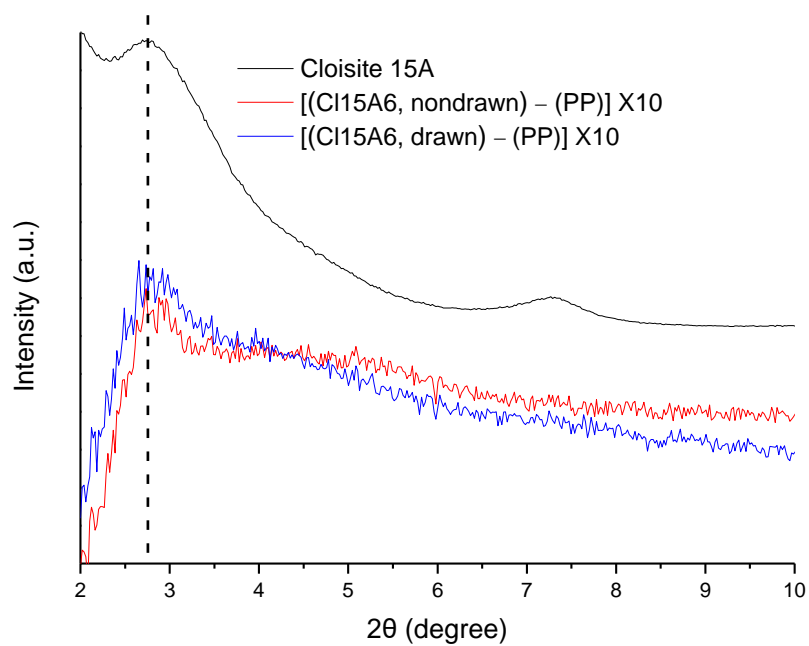

**Figure S8.** XRD diffractograms of Cloisite® 15A, and subtracted diffractogram of the Cl15A6 samples (drawn and non-drawn fibers) minus PP. The subtracted diffractogram was multiplied by 10.
